# Supplementary material for: Rivaroxaban versus Enoxaparin for Thromboprophylaxis after Total Knee Arthroplasty
Source: Atypon-hosted journal article supplement (doi:10.1056/nejmoa076016), 2008-06-25
Supplement: nejm_lassen_2776sa1.pdf [file nejm_lassen_2776sa1.pdf]

## Supplementary Appendix

This appendix has been provided by the authors to give readers additional information about their work.

Supplement to: Lassen MR, Ageno W, Borris LC, et al. Rivaroxaban versus enoxaparin for thromboprophylaxis after total knee arthroplasty. *N Engl J Med* 2008;358:2776-86.

Online supplement

**Table I.** Adverse events (safety population; n=2459)

|                                                                                                                         | <b>Rivaroxaban<br/>10 mg once daily (n=1220)</b> | <b>Enoxaparin)<br/>40 mg once daily (n=1239)</b> |
|-------------------------------------------------------------------------------------------------------------------------|--------------------------------------------------|--------------------------------------------------|
| <b>Adverse events (including deep vein thrombosis, pulmonary embolism, and bleeding events)</b>                         |                                                  |                                                  |
| Total adverse events                                                                                                    | 803 (65.8)                                       | 882 (71.2)                                       |
| Serious treatment-emergent events                                                                                       | 90 (7.4)                                         | 110 (8.9)                                        |
| Serious drug-related treatment-emergent events                                                                          | 26 (2.1)                                         | 19 (1.5)                                         |
| Adverse events leading to medication discontinuation                                                                    | 39 (3.2)                                         | 56 (4.5)                                         |
| Death                                                                                                                   | 0                                                | 6 (0.5)                                          |
| <b>Treatment-emergent adverse events with an incidence of <math>\geq 3\%</math> or difference of 10 or more events*</b> |                                                  |                                                  |
| Any system organ class                                                                                                  | 776 (63.6)                                       | 844 (68.1)                                       |
| Blood and lymphatic system disorders                                                                                    | 50 (4.1)                                         | 60 (4.8)                                         |
| Anemia                                                                                                                  | 38 (3.1)                                         | 48 (3.9)                                         |
| Cardiac disorders                                                                                                       | 57 (4.7)                                         | 51 (4.1)                                         |
| Gastrointestinal disorders                                                                                              | 301 (24.7)                                       | 334 (27.0)                                       |
| Constipation                                                                                                            | 79 (6.5)                                         | 67 (5.4)                                         |
| Diarrhea                                                                                                                | 18 (1.5)                                         | 34 (2.7)                                         |
| Nausea                                                                                                                  | 124 (10.2)                                       | 127 (10.3)                                       |
| Vomiting                                                                                                                | 129 (10.6)                                       | 161 (13.0)                                       |
| General disorders and administration-site conditions                                                                    | 161 (13.2)                                       | 197 (15.9)                                       |
| Edema peripheral                                                                                                        | 48 (3.9)                                         | 37 (3.0)                                         |
| Pyrexia                                                                                                                 | 83 (6.8)                                         | 115 (9.3)                                        |
| Infections and infestations                                                                                             | 67 (5.5)                                         | 74 (6.0)                                         |
| Injury, poisoning, and procedural complications                                                                         | 172 (14.1)                                       | 166 (13.4)                                       |
| Procedural pain                                                                                                         | 44 (3.6)                                         | 47 (3.8)                                         |
| Investigations                                                                                                          | 124 (10.2)                                       | 135 (10.9)                                       |
| Gamma-glutamyltransferase increased                                                                                     | 19 (1.6)                                         | 33 (2.7)                                         |
| Metabolism and nutrition                                                                                                | 30 (2.5)                                         | 50 (4.0)                                         |
| Musculoskeletal and connective tissue disorders                                                                         | 71 (5.8)                                         | 69 (5.6)                                         |
| Nervous system disorders                                                                                                | 72 (5.9)                                         | 93 (7.5)                                         |
| Headache                                                                                                                | 16 (1.3)                                         | 30 (2.4)                                         |
| Psychiatric disorders                                                                                                   | 95 (7.8)                                         | 92 (7.4)                                         |
| Insomnia                                                                                                                | 49 (4.0)                                         | 52 (4.2)                                         |
| Renal and urinary disorders                                                                                             | 45 (3.7)                                         | 55 (4.4)                                         |
| Respiratory, thoracic, and mediastinal disorders                                                                        | 31 (2.5)                                         | 38 (3.1)                                         |
| Skin and subcutaneous tissue disorders                                                                                  | 92 (7.5)                                         | 100 (8.1)                                        |
| Vascular disorders                                                                                                      | 203 (16.6)                                       | 290 (23.4)                                       |
| Deep vein thrombosis                                                                                                    | 123 (10.1)                                       | 196 (15.8)                                       |
| Hematoma                                                                                                                | 12 (1.0)                                         | 27 (2.2)                                         |
| <b>Serious treatment-emergent adverse events with an incidence of <math>\geq 0.2\%*</math></b>                          |                                                  |                                                  |
| Arthritis infective                                                                                                     | 3 (0.2)                                          | 0                                                |
| Pneumonia                                                                                                               | 1 (0.1)                                          | 4 (0.3)                                          |
| Wound infection                                                                                                         | 3 (0.2)                                          | 3 (0.2)                                          |
| Post-procedural hemorrhage                                                                                              | 4 (0.3)                                          | 0                                                |
| Wound secretion                                                                                                         | 3 (0.2)                                          | 1 (0.1)                                          |
| Alanine aminotransferase increased                                                                                      | 7 (0.6)                                          | 4 (0.3)                                          |
| Aspartate aminotransferase increased                                                                                    | 4 (0.3)                                          | 3 (0.2)                                          |

|                                                                                                             |          |          |
|-------------------------------------------------------------------------------------------------------------|----------|----------|
| Blood bilirubin increased                                                                                   | 3 (0.2)  | 0        |
| Hemarthrosis                                                                                                | 1 (0.1)  | 3 (0.2)  |
| Dyspnea                                                                                                     | 0        | 3 (0.2)  |
| Pulmonary embolism                                                                                          | 0        | 5 (0.4)  |
| Deep vein thrombosis                                                                                        | 20 (1.6) | 40 (3.2) |
| Hematoma                                                                                                    | 2 (0.2)  | 4 (0.3)  |
| Wound hemorrhage                                                                                            | 3 (0.2)  | 3 (0.2)  |
| <b>Serious drug-related treatment-emergent adverse events with an incidence of <math>\geq 0.2\%</math>*</b> |          |          |
| Post-procedural hemorrhage                                                                                  | 4 (0.3)  | 0        |
| Alanine aminotransferase increased                                                                          | 4 (0.3)  | 2 (0.2)  |
| Aspartate aminotransferase increased                                                                        | 3 (0.2)  | 2 (0.2)  |
| Wound hemorrhage                                                                                            | 2 (0.2)  | 3 (0.2)  |

Data are n (%). \*According to MedRA, descending frequency.

**Table II.** Pre-specified sensitivity analyses for the primary efficacy outcome

| <b>Randomized population</b>      | <b>No. (percent)</b> | <b>Absolute difference (percent)<br/>(95% confidence intervals)</b> |
|-----------------------------------|----------------------|---------------------------------------------------------------------|
| Observed cases*                   |                      |                                                                     |
| Rivaroxaban (n=1254)              | 85 (6.8)             | -6.62 (-8.94 to -4.31)                                              |
| Enoxaparin (n=1277)               | 171 (13.4)           |                                                                     |
| Realistic scenario <sup>†</sup>   |                      |                                                                     |
| Rivaroxaban (n=1254)              | 122 (9.7)            | -8.43 (-11.07 to -5.79)                                             |
| Enoxaparin (n=1277)               | 232 (18.2)           |                                                                     |
| Best-case scenario <sup>‡</sup>   |                      |                                                                     |
| Rivaroxaban (n=1254)              | 79 (6.3)             | -6.71 (-8.98 to -4.45)                                              |
| Enoxaparin (n=1277)               | 166 (13.0)           |                                                                     |
| Pessimistic scenario <sup>§</sup> |                      |                                                                     |
| Rivaroxaban (n=1254)              | 509 (40.6)           | -3.56 (-7.33 to 0.20)                                               |
| Enoxaparin (n=1277)               | 565 (44.2)           |                                                                     |

\*Patients with inadequate assessment of thromboembolism were included regardless of venography or symptomatic event/death time window.

<sup>†</sup>Within a geographic region, patients with inadequate assessment of thromboembolism were assumed to have the same risk for asymptomatic deep vein thrombosis as those with adequate assessment belonging to the same medication group.

<sup>‡</sup>All patients with inadequate assessment of thromboembolism were assumed to be event-free.

<sup>§</sup>All patients with inadequate assessment of thromboembolism were assumed to have an event.

**Table III.** Analysis of primary efficacy endpoint (adjudicated), regardless of venography/symptomatic event/death time window (population: randomized patients who have evaluable bilateral venography [adjudicated] or a confirmed symptomatic event/death)

| Endpoint                  | Medication group | Point estimate (%) | 95% exact confidence interval | Mantel–Haenszel weighted difference to enoxaparin |                         |
|---------------------------|------------------|--------------------|-------------------------------|---------------------------------------------------|-------------------------|
|                           |                  |                    |                               | Point estimate (%)                                | 95% confidence interval |
| Primary efficacy endpoint | Rivaroxaban      | 85/834 (10.19)     | 8.22 to 12.45                 | –8.86                                             | –12.15 to –5.57         |
|                           | Enoxaparin       | 171/888 (19.26)    | 16.71 to 22.01                | –                                                 | –                       |

Confidence intervals for proportions were calculated using exact methods.

Confidence intervals for weighted differences were calculated using asymptotic methods, with weights based upon sample sizes per strata (geographic region). Rate=number of events/number at risk, where number of events=number of patients with the event reported/number at risk=number of patients in reference population

**Table IV.** Analysis of primary efficacy endpoint, regardless of venography/symptomatic event/death time window and including evaluable investigator assessments if adjudicated assessment is non-evaluable (population see footnote)

| Endpoint                  | Medication group | Point estimate (%) | 95% exact confidence interval | Mantel–Haenszel weighted difference to enoxaparin |                         |
|---------------------------|------------------|--------------------|-------------------------------|---------------------------------------------------|-------------------------|
|                           |                  |                    |                               | Point estimate (%)                                | 95% confidence interval |
| Primary efficacy endpoint | Rivaroxaban      | 114/980 (11.63)    | 9.69 to 13.81                 | –8.05                                             | –11.20 to –4.91         |
|                           | Enoxaparin       | 200/1013 (19.74)   | 17.33 to 22.33                | –                                                 | –                       |

Population based on: randomized patients who have evaluable bilateral venography (adjudicated) or confirmed symptomatic event/death. Plus, randomized patients excluded from above who have evaluable bilateral venography/ultrasonography as performed by the investigator or a symptomatic event/death, provided the symptomatic event was not adjudicated to be a non-event by the venous thromboembolism committee.

Confidence intervals for proportions were calculated using exact methods. Confidence intervals for weighted differences were calculated using asymptotic methods, with weights based upon sample sizes per strata (geographic region). Rate=number of events/number at risk, where number of events=number of patients with the event reported/number at risk=number of patients in reference population.
